# Supplementary material for: Ultrasensitive catechin electrochemical sensor based on uniform ordered mesoporous carbon hollow spheres (MCHSs) advanced carbon-based conductive materials
Source: Royal Society of Chemistry journal article supplement (doi:10.1039/d2an01405j), 2022-01-01
Supplement: d2an01405j1.pdf [file d2an01405j1.pdf]

## Supplementary Material

### **Ultrasensitive catechin electrochemical sensor based on uniform ordered mesoporous carbon hollow spheres (MCHSS) advanced carbon based conductive materials**

Li Zhang <sup>a,b</sup>, Jiejun Li <sup>a</sup>, Chenxi Wang<sup>a</sup>, Linzi Huang<sup>a</sup>, Minghui Huang<sup>a</sup>, Yuefan Wang<sup>a</sup>, Xi Tang<sup>a</sup>, Pengcheng Zhao<sup>a</sup>, Yixi Xie<sup>a,d\*</sup>, Junjie Fei<sup>a,c\*</sup>

<sup>a</sup> *Key Laboratory of Environmentally Friendly Chemistry and Applications of Ministry of Education, College of Chemistry, Xiangtan University, Xiangtan 411105, People's Republic of China*

<sup>b</sup> *College of Chemistry and Materials Engineering, Huaihua University, Huaihua 418000, PR China*

<sup>c</sup> *Hunan Institute of Advanced Sensing and Information Technology, Xiangtan University, Xiangtan 411105, People's Republic of China*

<sup>d</sup> *Key Laboratory for Green Organic Synthesis and Application of Hunan Province, Xiangtan University, Xiangtan 411105, People's Republic of China*

\* *Yixi Xie, College of Chemistry, Xiangtan University, Xiangtan, China*

*E-mail: xieyixige@xtu.edu.cn*

\* *Junjie Fei, Ph.D., College of Chemistry, Xiangtan University, Xiangtan, China*

*E-mail: fei\_junjie@xtu.edu.cn*

*Tel.: 86-731-58292060*

## 2. List of Supplementary Tables and Figures:

Scheme S1. The reasonable electrochemical reaction mechanism of catechin at MCHSs/GCE.

Figure S1. SEM images of (A, B)  $\text{SiO}_2@\text{SiO}_2@\text{RF}$  and (C, D)  $\text{SiO}_2@\text{SiO}_2@\text{C}$ .

Figure S2. XRD patterns of MCHSs.

Figure S3. The XPS spectra (A) the survey spectrum, (B) C1s spectrum, (C) O1s spectrum.

Figure S4.  $\text{N}_2$  adsorption–desorption isotherms (inset) and pore size distribution of MCHSs.

Figure S5. (A) The oxidation peak currents of 0.5  $\mu\text{M}$  catechin on the different concentration MCHSs/GCE in 0.1 M PBS solution. (B) The oxidation peak currents of 0.5  $\mu\text{M}$  catechin on the MCHSs/GCE in 0.1 M PBS solution over a pH range of 4.5 to 8.5. (C) Influence of accumulation time on the oxidation peak current of 0.25  $\mu\text{M}$  catechin. Accumulation potential: 0.2V. (D) Influence of accumulation potential on the oxidation peak current of 0.25  $\mu\text{M}$  catechin. Accumulation time: 1200 s.

Figure S6. The molecular electrostatic potential (MEP) map of catechin (the blue dot is the minimum and the yellow dot is the maximum, kcal/mol).

Table S1. Analytical results for the catechin detection from real samples ( $n = 3$ ).

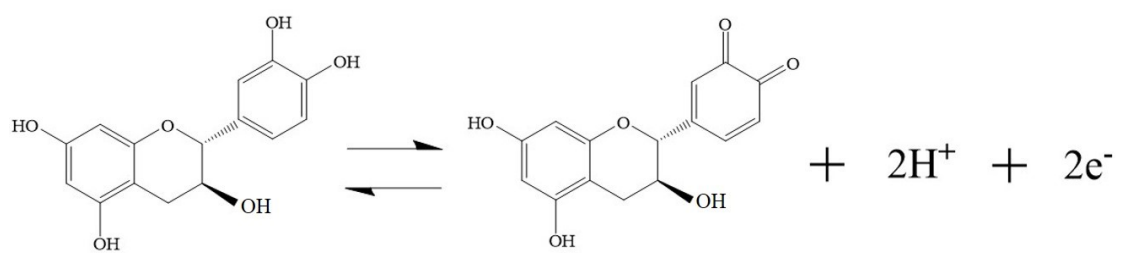

Scheme S1

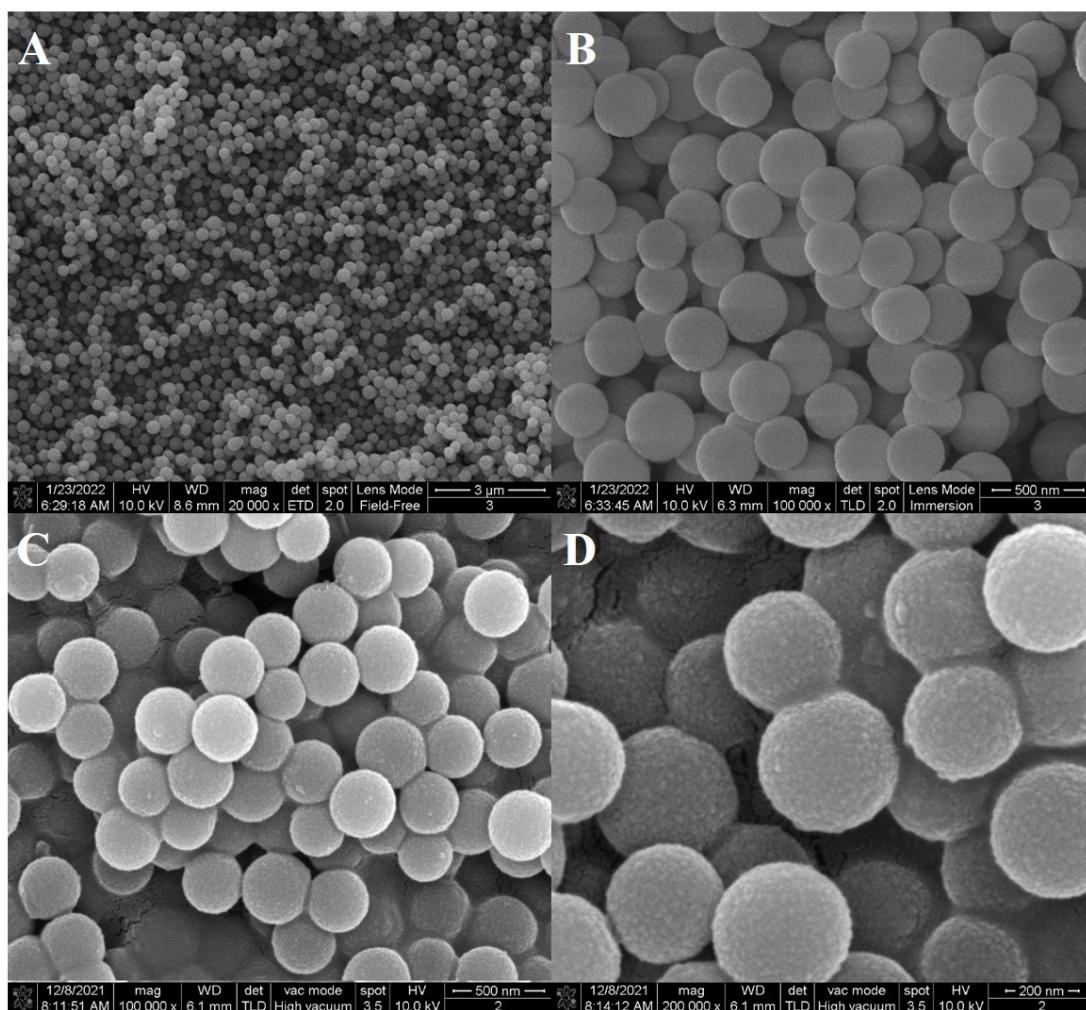

Figure S1

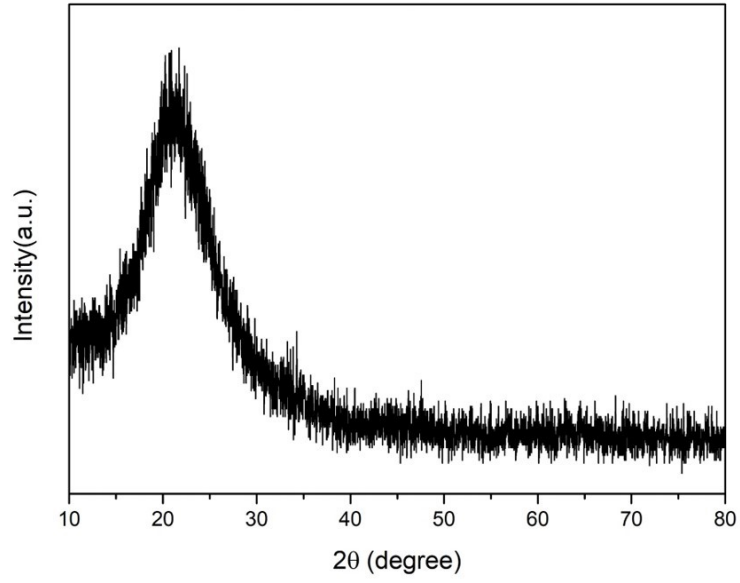

Figure S2

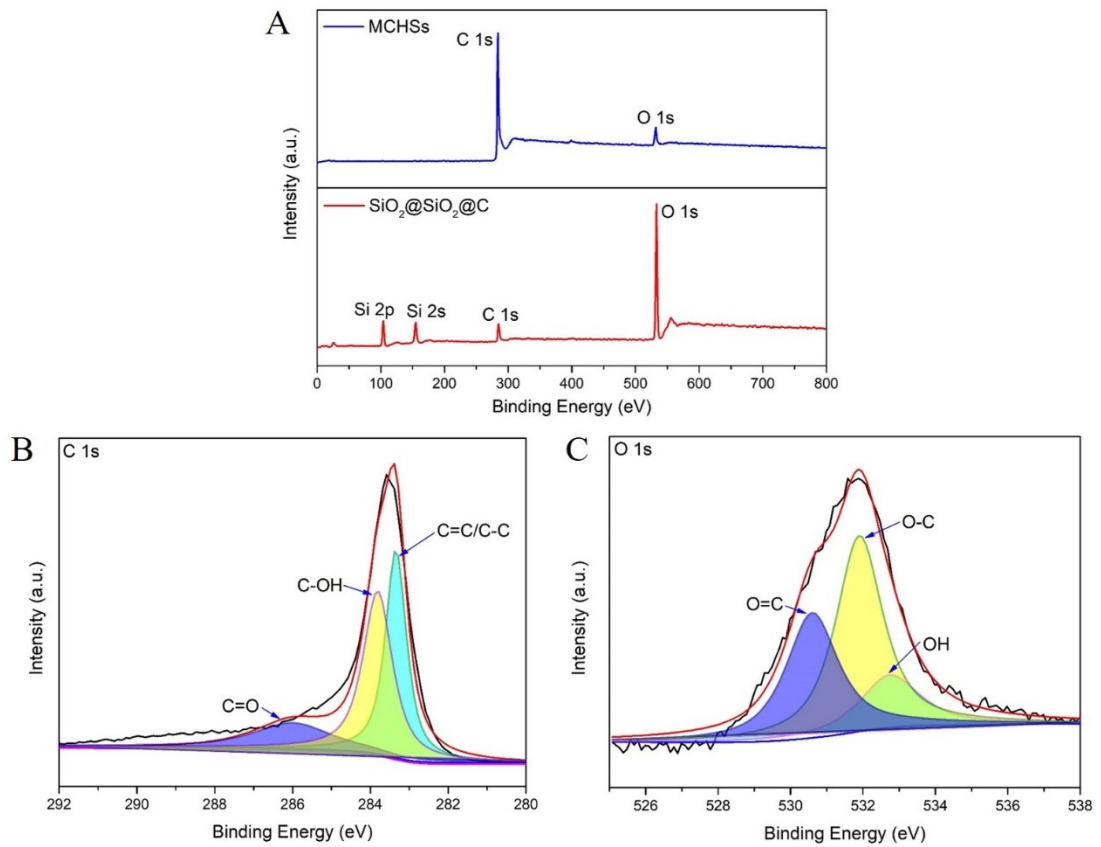

Figure S3

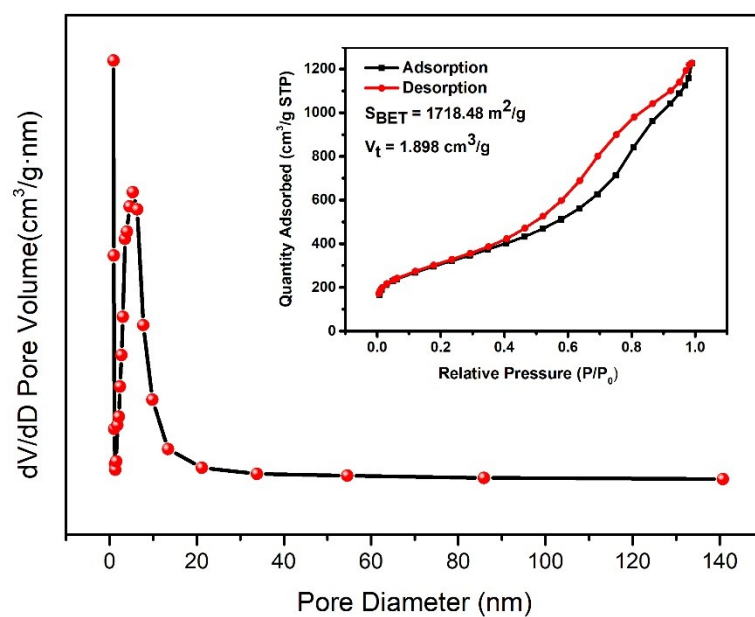

Figure S4

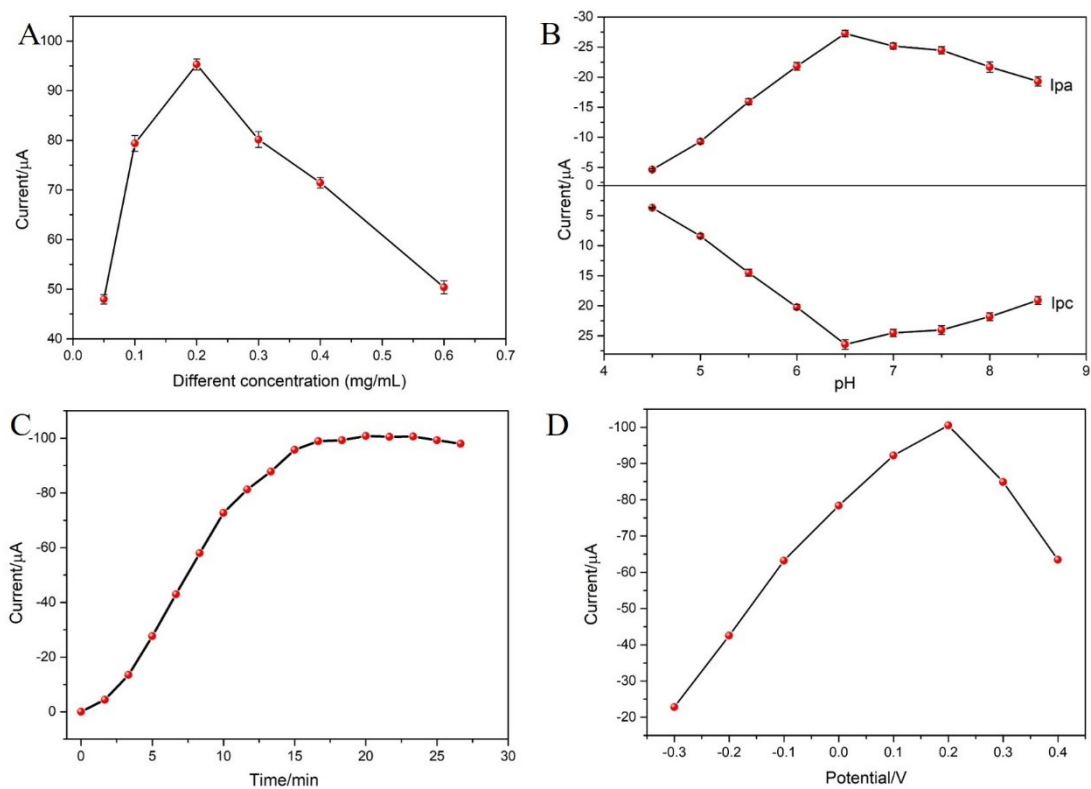

Figure S5

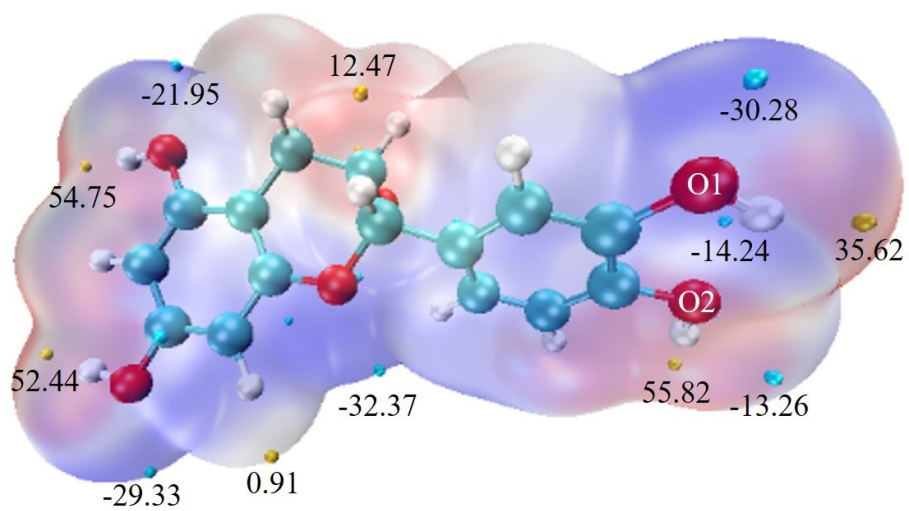

Figure S6

Table S1

| Added (nM) | Founded (nM) | Recovery (%) | RSD (%) |
|------------|--------------|--------------|---------|
| 0          | 39.27        | -            | -       |
| 20         | 60.21        | 104.7        | 0.82    |
| 40         | 78.69        | 98.6         | 1.02    |
| 60         | 96.13        | 94.8         | 0.64    |
